# Supplementary material
Source: Elsevier journal article supplement (https://discovery.ucl.ac.uk/id/eprint/1419996/2/mmc1.pdf)
Supplement: mmc1 [file mmc1.pdf]

The American Journal of Human Genetics, 91

## **Supplemental Data**

### **Mutations in Multidomain Protein MEGF8**

### **Identify a Carpenter Syndrome Subtype**

### **Associated with Defective Lateralization**

Stephen R.F. Twigg, Deborah Lloyd, Dagan Jenkins, Nursel H. Elçioglu, Christopher D.O. Cooper, Nouriya Al-Sannaa, Ali Annagür, Gabriele Gillessen-Kaesbach, Irina Hüning, Samantha J.L. Knight, Judith A. Goodship, Bernard D. Keavney, Philip L. Beales, Opher Gileadi, Simon J. McGowan, and Andrew O.M. Wilkie

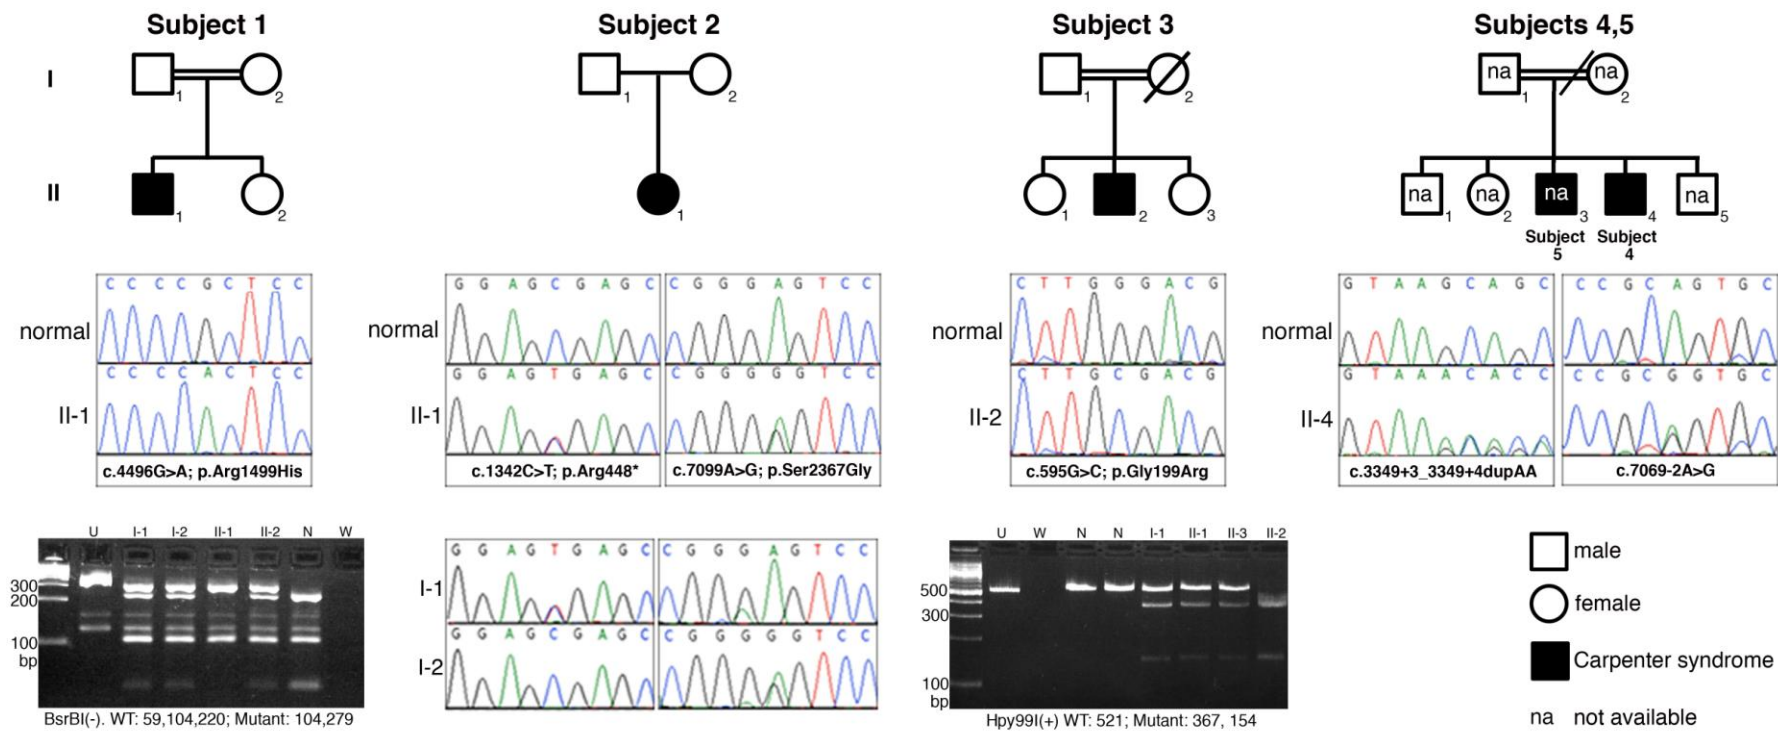

**Figure S1. Pedigrees, DNA Sequence Analysis, and Mutation Segregation of Individuals with *MEGF8* Mutations**

For each family the individuals analyzed in the pedigree are shown (top panel) together with a representative sequence chromatogram for a normal control and proband (middle panel). The lower panel shows either restriction digest or sequence analysis of all available family samples for Subjects 1-3. In family of Subject 1, I-1, I-2 and II-2 are heterozygous for the p.Arg1499His mutation, which is present in homozygous state in II-I. In family of Subject 2 the p.Arg448\* and p.Ser2367Gly mutations present in the proband were inherited from I-1 and I-2, respectively. In family of Subject 3, individuals I-1, II-1 and II-3 are heterozygous for the p.Gly199Arg mutation, which is present in homozygous state in II-2. In family of Subjects 4 and 5, DNA was only available from Subject 4. U, undigested; N, normal control; W, water control.

Subject 4

Subject 5

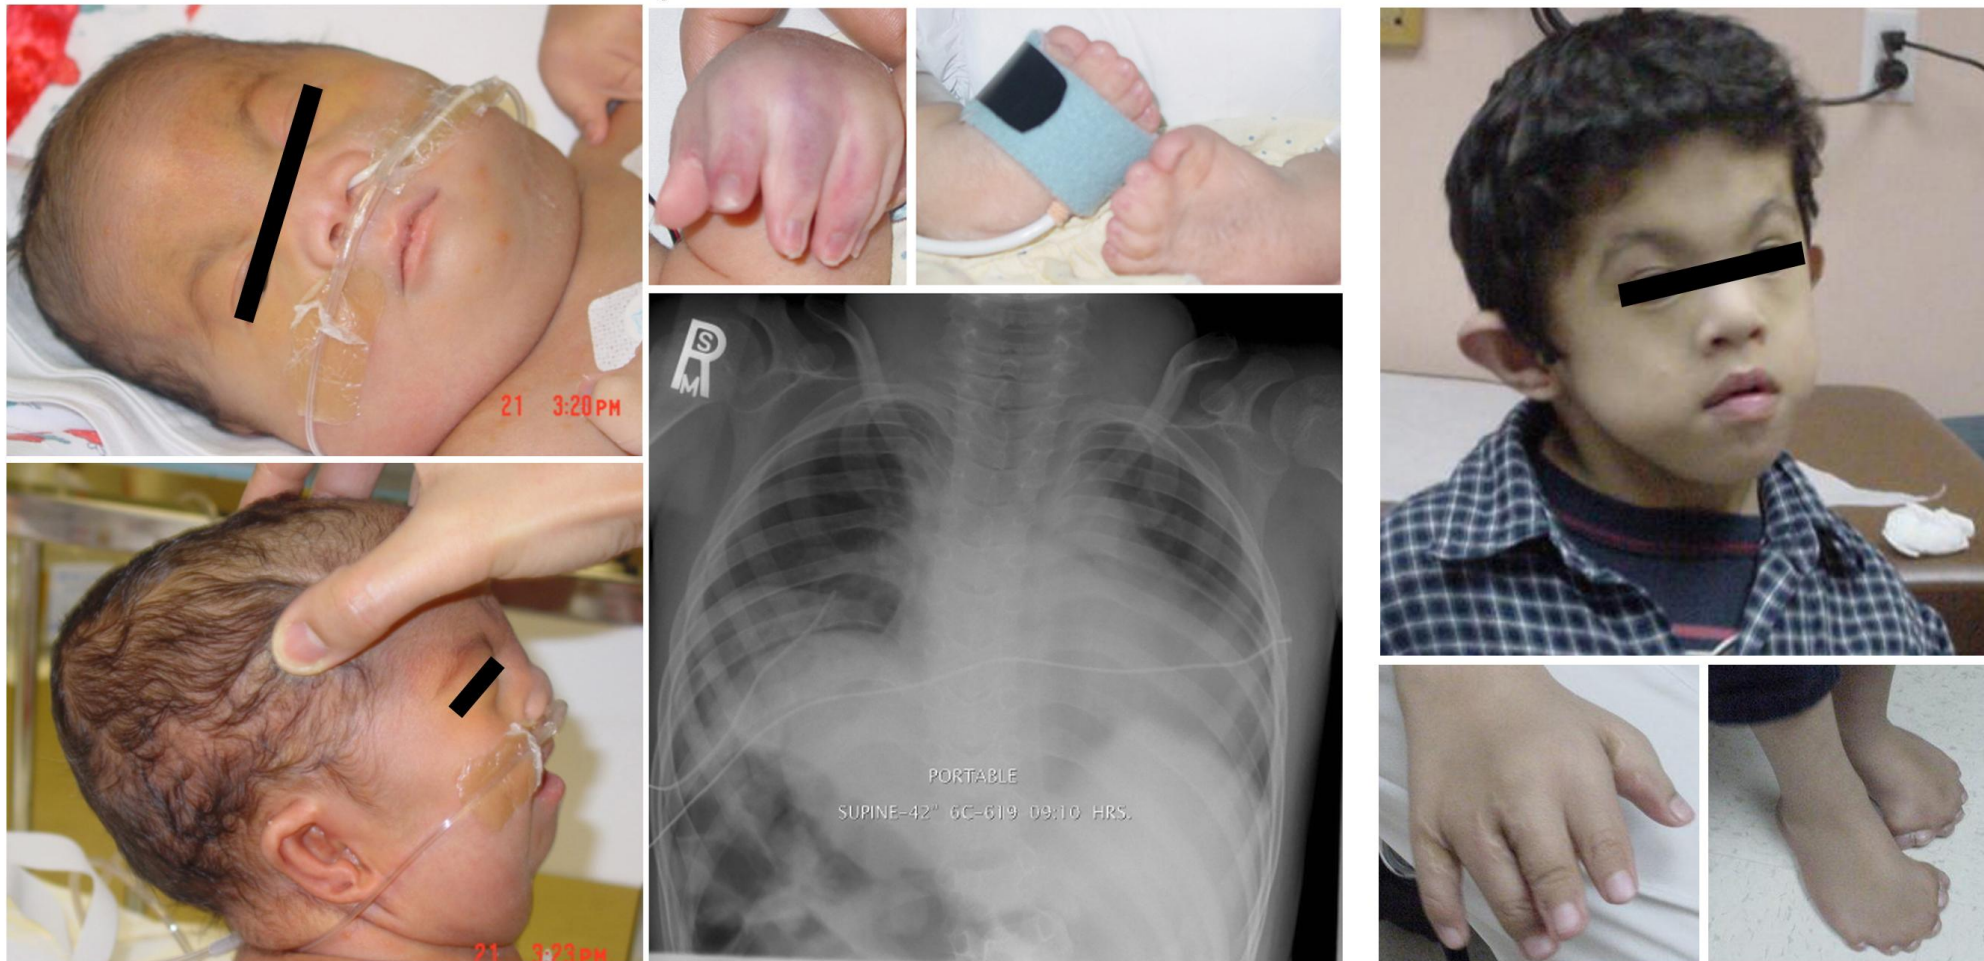

**Figure S2. Clinical Features of Subjects 4 and 5**

Left hand panel, Subject 4, appearance of face and limbs, at one week of age. A chest radiograph (age 3 years, 4 months) was reported as showing interposition of the colon on the right side of the chest and uncertain assignment of abdominal situs. Right hand panel, Subject 5, appearance of face and limbs aged 6 years, 6 months (hands are postoperative following syndactyly releases).





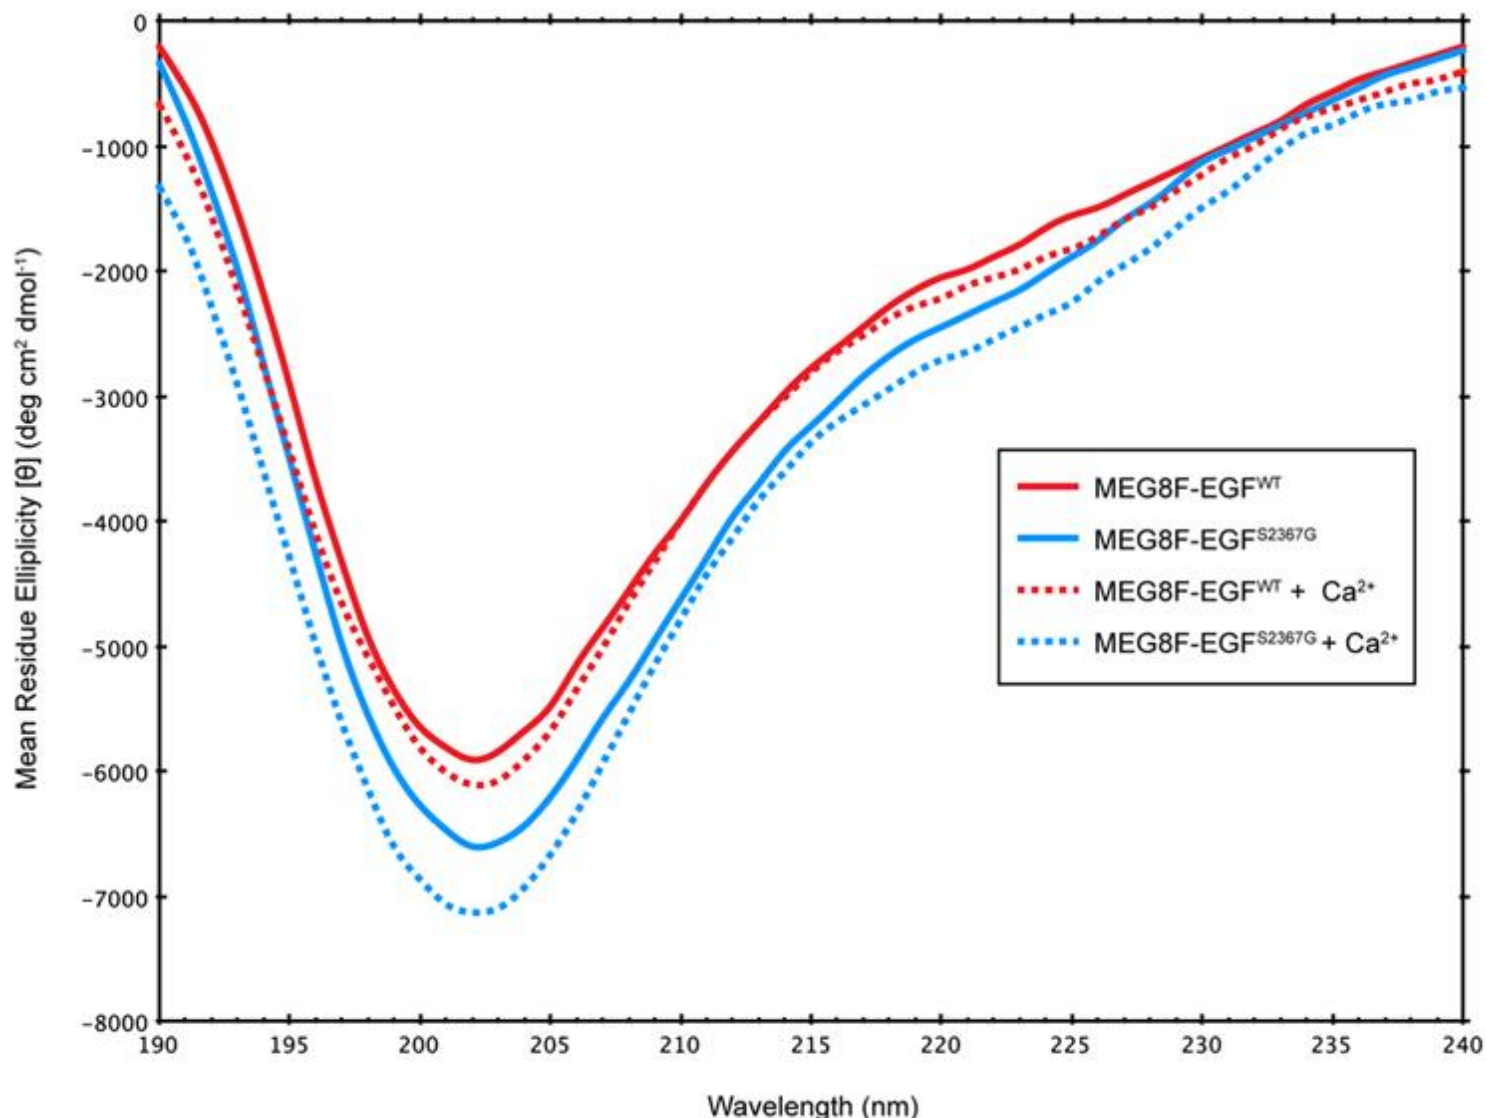

**Figure S4. Far-UV Circular Dichroism Spectroscopy of EGF-Laminin Domain Containing the p.Ser2367Gly MEGF8 Missense Substitution**

The spectra show that the normal and mutant domains are disordered to similar extents, and this was not affected by addition of equimolar calcium (CaCl<sub>2</sub>).

Methods: The normal and mutant laminin EGF domains of MEGF8 were amplified from sequence-verified cloned cDNA samples (MEGF8F-EGF<sup>WT</sup> or MEG8F-EGF<sup>S2367G</sup> respectively), using oligonucleotides MEGF8A-f010 and MEGF8A-r003 (Table S2) and Pfx DNA polymerase (Invitrogen, Paisley, UK) and cloned into pNIC28-Bsa4. Protein expression was induced with 0.1 mM isopropyl-1-thio-β-D-galactopyranoside. Cell pellets were resuspended in binding buffer (50 mM sodium phosphate [pH 7.5], 500 mM NaCl, 5% glycerol, 10 mM imidazole), with the addition of 1x protease inhibitor cocktail set VII (Merck, Darmstadt, Germany) and 15 U/ml Benzonase (Merck) in the absence of reducing agents. After lysis and centrifugation cells were passed through a 3 ml Ni-IDA (iminodiacetic acid) gravity-flow column, washed in 30 volumes binding buffer (30 mM imidazole) and eluted in 5 x 2 volumes elution buffer (300 mM imidazole). Pooled fractions were cleaved overnight with Tobacco Etch Virus protease and dialyzed into 0.5 x binding buffer. Samples were passed again through 1 ml Ni-IDA gravity-flow columns to remove uncleaved protein and the His6 tag. Column flow-through was fractionated by anion exchange chromatography using 1 ml HiTrap Cpto-Q columns and a 30 column volume linear gradient of buffer A (20 mM Tris-Cl, 100 mM NaCl, 5% glycerol) to 50% buffer B (20 mM Tris-Cl, 2 M NaCl, 5% glycerol), on an ÄKTAexpress™ (GE Healthcare, Amersham, UK) system at 8 °C. Column flow-through was concentrated and fractionated by size exclusion chromatography on a HiLoad 16/60 S75 column equilibrated in 10 mM potassium phosphate (pH 7.5), 250 mM NaCl. Protein identity was confirmed by electrospray ionization time-of-flight mass spectrometry, LC/ESI-TOF (Agilent Technologies, South Queensferry, UK) and tryptic digestion followed by MS/MS analysis on an ESI ion trap MS

(Brucker Daltonics, Billerica, MA, USA). Circular dichroism experiments were performed on proteins at 100  $\mu\text{g/ml}$  in the presence and absence of calcium, with 10 mM potassium phosphate (pH 7.5) as the standard buffer, on a Jasco J-810 spectrophotometer (Jasco, Great Dunmow, Essex, UK). Data were smoothed with the Savitsky-Golay algorithm<sup>1</sup> and smoothed buffer blank spectra were subtracted from the respective smoothed data. Data were converted to Mean Residue Ellipticity ( $[\theta]$ ) and deconvoluted with the CDSSTR algorithm,<sup>2</sup> implemented in the DICHROWEB server.<sup>3</sup>

1. Savitsky, A., and Golay, M.J.E. Smoothing and differentiation of data by simplified least squares procedures. *Anal. Chem.* 36, 1627–1639 (1964).
2. Johnson, W.C. Analyzing protein circular dichroism spectra for accurate secondary structures. *Proteins* 35, 307-312 (1999).
3. Whitmore, L., and Wallace, B.A. DICHROWEB, an online server for protein secondary structure analyses from circular dichroism spectroscopic data. *Nucleic Acids Res.* 32, W668-673 (2004).

**Table S1. Classification of Cardiac Anomalies in Patients with Nonsyndromic Isomerism/Laterality Disturbances**

| Case | Cardiac Anomalies Present <sup>a</sup>                                                                                                                                                                                                                                                                                                          |
|------|-------------------------------------------------------------------------------------------------------------------------------------------------------------------------------------------------------------------------------------------------------------------------------------------------------------------------------------------------|
| 1    | Atrial situs inversus, dextrocardia, (L) sided SVC, ventricle connects to (L) atrium, large inlet VSD, (L) sided morphological (R) ventricle connects to aorta, pulmonary atresia with VSD, (R) aortic arch, confluent pulmonary arteries supplied by PDA, hypoplastic (R) sided (L) ventricle                                                  |
| 2    | Dextrocardia with situs solitus, atrio-ventricular discordance with arterio-ventricular discordance (congenitally corrected TGA), VSD, pulmonary atresia                                                                                                                                                                                        |
| 3    | Pulmonary atresia, hypoplastic (R) ventricle, tricuspid valve, ASD, inlet VSD, atrial isomerism                                                                                                                                                                                                                                                 |
| 4    | Heterotaxy syndrome situs inversus, (L) sided IVC, bilateral SVCs (no innominate vein), TGA, pulmonary atresia, complete AVSD, asplenia                                                                                                                                                                                                         |
| 5    | Common atrium (L) atrial isomerism, bilateral superior vena cava                                                                                                                                                                                                                                                                                |
| 6    | Dextrocardia, DORV, ventricle with side by side arteries, pulmonary stenosis, (R) isomerism                                                                                                                                                                                                                                                     |
| 7    | Complex cyanotic CHD, (L) atrial isomerism, complete AVSD with small (L) ventricle, (L) AV valve component, DORV, mild pulmonary stenosis, (R) aortic arch, moderate AV valve regurgitation                                                                                                                                                     |
| 8    | (L) atrial isomerism, bilateral SVC, absent innominate vein, interrupted, IVC with azygos continuation to (L) SVC, common atrium, (R) pulmonary veins into (R) sided atrium, (L) pulmonary veins into (L) atrium, polysplenia                                                                                                                   |
| 9    | (R) atrial isomerism, dextrocardia, complete AVSD, pulmonary atresia, asplenia                                                                                                                                                                                                                                                                  |
| 10   | DORV with subpulmonary and pulmonary stenosis, mitral atresia, VSD, hypoplastic (L) ventricle, (L) atrial isomerism                                                                                                                                                                                                                             |
| 11   | (L) Atrial isomerism, common atrium                                                                                                                                                                                                                                                                                                             |
| 12   | (L) Atrial isomerism, common atrium, azygos continuation IVC to (R) SVC, IVC continuation to (R) side of atrium, (L) SVC to (L) side of atria, hypoplastic (R) AV valve, hypoplastic (R) ventricle, small VSD, pulmonary atresia, hepatic veins to IVC, (R) sided pulmonary veins to (R) side of atrium, (L) pulmonary veins to (L) side atrium |
| 13   | Situs inversus, mitral atresia, DORV                                                                                                                                                                                                                                                                                                            |
| 14   | (R) atrial isomerism, (L) sided SVC, IVC to (L) sided atrium, ostium primum ASD, common AV valve, DORV, TGA, valvar and subvalvar stenosis, SVC connection to (R) pulmonary artery                                                                                                                                                              |
| 15   | Complex pulmonary atresia, heterotaxy, situs inversus                                                                                                                                                                                                                                                                                           |

<sup>a</sup>Abbreviations: ASD, atrial septal defect; AV, atrio-ventricular; AVSD, atrio-ventricular septal defect; CHD, congenital heart disease; DORV, double outlet right ventricle; IVC, inferior vena cava; L, left; R, right; SVC, superior vena cava; TGA, transposition of great arteries; VSD, ventricular septal defect.

**Table S2. Primers and Amplification Conditions for *MEGF8***

| Screening |                                               |                                                     |                   |                                       |
|-----------|-----------------------------------------------|-----------------------------------------------------|-------------------|---------------------------------------|
| Amplicon  | Primer Sequence 5'→3' (M13 tags in lowercase) |                                                     | Product Size (bp) | Amplification Conditions <sup>a</sup> |
|           | Forward                                       | Reverse                                             |                   |                                       |
| Ex1       | GATCTACAAGGTCATGTTATGCCTATAGAG                | GTGGTGAGTGGATGAATGCACACATGAATG                      | 381               | 65                                    |
| Ex2       | GGGTTTGGTGTACAATTGTGGGAGGCTGCAGGG             | CCTCTTACTGACTCTCTGTCCCTCCTTTC                       | 329               | 65                                    |
| Ex3       | GGTGGAGAGAGGCAAAGGAAGGAGATGAGG                | GGGGAGTTTCATGCAGGAGCAAGGTCAG                        | 438               | 65                                    |
| Ex4,5     | CCCTTTGTGCCCTGTCTGTCTCATTCTG                  | CCCGGCTGGGTCTGATTGAGTGGAAAGG                        | 521               | 65                                    |
| Ex6       | GTCTAAGCCTGGCTCTGGCTCTCTTGCTG                 | GCCTGGCCTGTGGAGCATGGGTTATGGG                        | 521               | 65                                    |
| Ex7,8     | GCTCCTAAGAGCCTGGAGGAGGGAGAG                   | GACCCTCAGGAGCCCCTAGGGAAGAAC                         | 512               | 65                                    |
| Ex9       | GCT GGG CTG TGG CCC AGG AGA ATC AG            | CCTTTCCCTCACCTGTGGAAACCCTGCTA                       | 319               | 65                                    |
| Ex10      | GCTAAAGCAAGCGGGGACTTGGGAGG                    | CTATGCTAGGGAACAGAGGGTCTAGGG                         | 254               | 65                                    |
| Ex11,12   | GATCTCTTGAGCTCCAGTTGACAGTGAG                  | CCTAGGATCAGGATCATCAACACCCCACCC                      | 496               | 65                                    |
| Ex 12A    | CTGATGTGGCCTGTGAGTCCAGAAAGGG                  | GATGCTCTATACCACACCCTAACTCCC                         | 332               | 65                                    |
| Ex13      | GTCTGAGGAAGGAATGGGAAGGGTTCTGAGG               | CAGAAAGCCCAGGTGATCTGAGGCTGGGG                       | 328               | 65                                    |
| Ex14      | CTTTCAGTTAGCGCCAGACTCTGACCCC                  | CTTGACTGCCATTGCCTGCTGTGGCTCCC                       | 376               | 65                                    |
| Ex15      | CCAAAGGAAAGGGCTGAGTGGGGTTCTG                  | CCACAGCCAGCACACATCCCCAGGCAC                         | 236               | 65                                    |
| Ex16,17   | gtaaaacgacggccagtCCCCTCTGCAGCCAGTGAGTCA       | agcggataacaatttcacacaggaCAGTACGGAAAAGGGAAGGTGGCCATG | 570               | 65                                    |
| Ex18      | GTTTCTGTCTCTCCGCTCTCCCTTTCCTGTCAT             | CACAGGAGGGGACCCAGCGCCATG                            | 572               | 65                                    |
| Ex19      | GGTGGAGATGATGGGGTGCTTTAGGGG                   | CTAGAGCTGCATGAGAGGACACTGAGG                         | 386               | 65                                    |
| Ex20      | GGGGTCAGGGTTTAGCTGAGCCAGTAGG                  | CCACTGTGTCCCAAGCACACCCTACC                          | 349               | 65                                    |
| Ex21      | GGTAGGGTGTGCTTGGGGACACAGTGG                   | CAGGCTGGGTCAGGGGACACGGTTCTGG                        | 387               | 65                                    |
| Ex22      | GTTCTCATCCTCATTGTCTCCTAATCCTC                 | CGGCAGAGCTGGGTCCTGAGCCCCTTC                         | 279               | 65                                    |
| Ex23      | CTTAGCATCTGGGGGTGGAAGGGGCCAGG                 | CCCTGATCACCAGCCCTGTCCCACCAGAC                       | 367               | 65                                    |
| Ex24      | GTAACCAGGTACAGGTGGGAGAGGGCAAGTC               | ATTGGGGATCAGGCTAGGGTCAGGACAAAGTGC                   | 319               | 65                                    |



|         |                                          |                                             |     |                 |
|---------|------------------------------------------|---------------------------------------------|-----|-----------------|
| Ex25    | AGCCGTGAGTTGTGGGTACCCGCTGTCTAG           | CTCTGAGGTGACTCTTAGCATCCCGAGGTGAC            | 339 | 65              |
| Ex26    | GGTCACCTTGAAGGATGCTGGGATGACTG            | GTGTGAGGGCTGGGGAGTGGGCTGGGG                 | 309 | 65              |
| Ex27    | CTTCTACCCACAAGGTGACCCCTGACCTC            | GAGCCCACAGGAAGCCCAGATGCC                    | 314 | 65              |
| Ex28    | GGTCGGCGGGGTCAGTGCTGTTGTCAG              | CTCCCTCCTGCCCCATACATCCTTGGGTC               | 273 | 65              |
| Ex29,30 | CTTGGAGGCAGGGGGCTAGAAGCAAGAGACT          | GATGGGGCTCCTCCTGGATGTCCCTCAG                | 582 | 65              |
| Ex31    | CCTGGAGTCTCCTGCTCTCTATCTGTCTG            | CACCCCTTTCCTGAACCAGACGGTATACTCC             | 398 | 65              |
| Ex32    | CAGGGTTGGGGCCTGCAGGACAGT                 | GATGGGACCCTCAGCACCCCTCCT GA                 | 361 | 65              |
| Ex33    | CAGGGTCTCAGGAACCACCGAGTTCTCAG            | CAT AGG TGG GCT GCA CGG AGA GGA TGC         | 784 | 65*             |
| Ex34    | GCTGGGCTTGCATCTCCTGGGTCTGAGG             | GGAGGGTGGAGGAGATGGTGGAAAGAAAGG              | 371 | 65              |
| Ex35    | GTGTGGTCTGGGAAGATACCCAGAATGTGTTTGTAAAGCT | GGTCTGGCCCAGTATCCCTATGTTCACTGTATCAG         | 386 | 65              |
| Ex36    | TCAGAGGAGGCAGGAGGGAGGGCCTAG              | TGCTCCCCACAGACTCTCCACCCCTAGC                | 303 | 65              |
| Ex37    | GTGGGGTAGTTGGTTGGGTGCTAGGCCATG           | GGCTCAGGATGAGATGCGAGCCGCCTGA                | 369 | 65              |
| Ex38    | CCCTCCCGTGGGCTCTCAGAACCTGCCCC            | CAGCCCCCTCCTCCCTCAGACCCAGGCATC              | 316 | 65              |
| Ex39    | GGTTGGTCCAGGCCTTTCTATGATCACACTG          | GGCTCCAGAGCTACTCCAGTGAGAAGGG                | 262 | 65 <sup>b</sup> |
| Ex40    | GTTGCACAGAGTTGAGCTCACATATGGGG            | CTACCTCATCCCAGCCCTGACCTCCAC                 | 292 | 65              |
| Ex41-1  | GGCTACTTAGCAGTGGGTATAGAGTATTCGTCCTG      | CCCCGCGGCCATACCTCCCGTAC                     | 551 | 65              |
| Ex41-2  | gtaaacgacggccagtACCACCTCCACCACCCCTGCA    | agcgataacaattcacacaggaGAGGCCGGGGCAGTAGGGTCA | 543 | 65              |
| Ex41-3  | CAGCGCCGGCACTTGCAGGAGATGAC               | CCCCAGGTGGAGGGACCCCAAGTC                    | 572 | 65              |

#### Mutation Confirmation

| Mutation             | Primer Sequence 5'→3'         |                              | Product Size (bp) | Amplification Conditions <sup>a</sup> | Digest           |
|----------------------|-------------------------------|------------------------------|-------------------|---------------------------------------|------------------|
|                      | Forward                       | Reverse                      |                   |                                       |                  |
| c.595G>C             | CCCTTTGTGCCCTGTCTGTCTCATTCTG  | CCCGGCTGGGTCTGATTGAGTGGAAAGG | 521               | 65°C                                  | Hpy99I           |
| c.1342C>T            | GCTCCTAAGAGCCTGGAGGAGGGAGAG   | GACCCTCAGGAGCCCCTAGGGAAGAAC  | 512               | 65°C                                  | SEQ <sup>c</sup> |
| c.3349+3_3349+4dupAA | GGTGGAGATGATGGGGTGCTTTAGGGG   | CTAGAGCTGCATGAGAGGACACTGAGG  | 386               | 65°C                                  | SEQ <sup>c</sup> |
| c.4496G>A            | GGTCACCTTGAAGGATGCTGGGATGACTG | GTGTGAGGGCTGGGGAGTGGGCTGGGG  | 309               | 65°C                                  | BsrBI            |

|             |                                     |                          |     |      |                  |
|-------------|-------------------------------------|--------------------------|-----|------|------------------|
| c.7069-2A>G | GGCTACTTAGCAGTGGGTATAGAGTATTCGTCCTG | CCCCGCGGCCATACCTCCCCGTAC | 551 | 65°C | SEQ <sup>c</sup> |
| c.7099A>G   | GGCTACTTAGCAGTGGGTATAGAGTATTCGTCCTG | CCCCGCGGCCATACCTCCCCGTAC | 551 | 65°C | SEQ <sup>c</sup> |

**Primers Used for cDNA Mutagenesis<sup>d</sup>**

|           | Primer Sequence 5'→3'                |                                     |
|-----------|--------------------------------------|-------------------------------------|
|           | Forward                              | Reverse                             |
| c.595G>C  | TGAGCCTGGCTTCTTGCGACGTGCCTGTGACCT    | AGGTACAGGCACGTGCAAGAAGCCAGGCTCA     |
| c.4496G>A | CCAGGCCATCGCCCCACTCCTTCCATGCAGCCG    | CGGCTGCATGGAAGGAGTGGGGCGATGGGCTGG   |
| c.7099A>G | GGGAATCATTTCACGGGGGTCCGCTGGGCGGCCAGC | GCTGGCCGCCAGCGGACCCCCGTGAAATGATTCCC |

**Primers for cDNA Clone Sequencing**

|           |                                            |          |                                 |
|-----------|--------------------------------------------|----------|---------------------------------|
| 1R        | GGGGTACCATCACTGAAGAGGTGCAGCAGCATCTTGCC     | SEQ 8    | GGACCCGATGCCACCTTGTGG           |
| 1F        | GGCTAGCGAATTCATGGCCCTGGGCAAGGTTCTGGCCATGGC | DLSEQ 1F | GGGTCCTCAACCTCACCACCCTGCA       |
| 2F        | GGGCCGCTGCTTGCCAGTCTAAGTGGGAG              | SEQ 9    | GCACTGTCCTGACCGCACCTGG          |
| SEQ 1     | GGGGTCCTGACTGTGGCCTGCAGGAG                 | 6F       | CCCCTGCCGCCTGCTGTCCTCACCTGAGC   |
| SEQ 2     | GCCTTGACAGCACCAGCGGGGGCTATTGGG             | 4F       | GGAATGTGACGCTCTCCGGACCTGCAGTGAG |
| SEQ 3     | GTGGGGACTTGATGGCGTACAAGGT                  | SEQ 11   | GGAGCAGCAGCCTGCAGCAGTGT         |
| SEQ 4     | GGCGGGACCACAAGTATGCAGTAGAG                 | SEQ 12   | GGTGTGGGGCGCGTGACCACTG          |
| SEQ 5-2 F | CCCACGCCGTGGCCACTGCGAC                     | SEQ 14   | GTAACGAGCAGGATGGGACGGGCTGTCCATG |
| SEQ 5-2 R | GTCGCAGTGGCCACGGCGTGGG                     | SEQ 13   | GGTGGAGCAGGAGTGCTGCCTGG         |
| SEQ 7 REV | CCATTGGCCTCCAGTGCAGCAC                     | 42F2     | GTCGGCAGTGCTGGTGGTCCGCGGCGTG    |
| SEQ 8 REV | GGGCAGTAAGGGTGTGACCAGCAACGG                | 42F3     | CTCCACCTCCCGCCTTCCGCGGCTC       |
| SEQ 7     | GCTGCACTGGGAGGCCAATGG                      |          |                                 |

**Multiplex Ligation-Dependent Probe Amplification (MLPA)<sup>e</sup>**

| Probe    | Primer Sequence 5'→3'                                             |                                                                    | Size (bp) |
|----------|-------------------------------------------------------------------|--------------------------------------------------------------------|-----------|
|          | 5'                                                                | 3'                                                                 |           |
| Exon 4-1 | gggttcctaagggttgaGTCTCTCTGTCTTGTCTCTCCCTCTTATCTCTGCCTTT           | ATGTCTCCTTTCCCGCAGCCCCTGGGACCATGcttagattggatcttgctggcac            | 116       |
| Exon 4-2 | gggttcctaagggttgaCTTTCTTTTTTCTTCTTCTTCTTCTTCTTATCTGCCTTTGTGCATCTT | ATTTTTCCATGTGTCTCTCTGTTGCTCAATCTGTCTCTGcttagattggatcttgctggca<br>c | 128       |
| Exon 4-3 | gggttcctaagggttgaCACTCATTTCATTACCCACTCACACATTCTCTGATGTTTT         | ATCAATCTCTTGGTGAATTGCCTTCCACACACTCCCatctagattggatcttgctggcac       | 124       |

**Synthesis of Laminin-EGF Domain**

|                                                |                                          |
|------------------------------------------------|------------------------------------------|
| MEGF8A-f010                                    | MEGF8A-r003                              |
| TACTTCCAAT CCATGGATGGGACGGGCTGTCCATGTCAGAATAAC | TATCCACCTTTACTGTCATTTGGGCTCATGGAAGCAGTTG |

Note.— Primers for *MEGF8* analysis were designed using NM\_000019.9. <sup>a</sup>DNA was obtained from whole blood samples by phenol-chloroform extraction and was amplified in a total volume of 20  $\mu$ l containing 15 mM TrisHCl (pH 8.0), 50 mM KCl, 2.5 mM MgCl<sub>2</sub>, 100  $\mu$ M each dNTP, 0.4  $\mu$ M primers, and 0.5 units of Amplitaq Gold polymerase (Applied Biosystems) with or without 10% DMSO. Cycling conditions consisted of an 8 min denaturation step at 95°C, followed by 35 cycles of 95°C for 30 s, 65°C for 30 s (except \* 40 s) and 72°C for 30 s, with a final extension at 72°C for 10 min.

<sup>b</sup>Amplification was as above except the PCR buffer consisted of: 160 mM (NH<sub>4</sub>)<sub>2</sub>SO<sub>4</sub>, 500 mM Tris.HCl pH 9.2, 22.5 mM MgCl<sub>2</sub>, 5% Tween. Mutation confirmation was carried out by PCR using the above conditions and indicated primers, followed by restriction digest of 8  $\mu$ l of PCR product or <sup>c</sup>Sanger sequencing alone. <sup>d</sup> Site-directed mutagenesis was carried out using the QuikChange Site-Directed Mutagenesis Kit (Stratagene). Mutant nucleotides are highlighted in red. <sup>e</sup>Multiplex-ligation-dependent probe amplification was performed using synthetic oligonucleotide probes designed to *MEGF8* according to protocols available from MRC-Holland: <http://www.mrc-holland.com/pages/indexpag.html>. Fragments were analysed by capillary electrophoresis using an ABI 3130 containing POP-7 polymer. Peaks were visualized using Gene Mapper v3.7 (Applied Biosystems). Common PCR primer annealing sequences are shown in lower case, hybridizing sequences are shown in upper case and the 3' probe sequence is 5' phosphorylated.
